# Supplementary material for: Disordered spin gapless semiconducting CoFeCrGa Heusler alloy thin films on Si (100): experiment and theory
Source: Royal Society of Chemistry journal article supplement (doi:10.1039/d2nr03424g), 2022-12-12
Supplement: d2nr03424g1.pdf [file d2nr03424g1.pdf]

1 (Supplementary Information)

2 **Disordered Spin Gapless Semiconducting CoFeCrGa Heusler Alloy Thin**  
3 **Films on Si (100): Experiment and Theory**

4 Vireshwar Mishra<sup>1#</sup>, Amar Kumar<sup>1#</sup>, Lalit Pandey<sup>1</sup>, Nanhe Kumar Gupta<sup>1</sup>, Soumyarup Hait<sup>1</sup>, Vineet  
5 Barwal<sup>†</sup>, Nikita Sharma<sup>1</sup>, Nakul Kumar<sup>1</sup>, Sharat Chandra<sup>2</sup> and Sujeet Chaudhary<sup>1\*</sup>

6 <sup>1</sup>*Thin Film Laboratory, Department of Physics, Indian Institute of Technology Delhi, New Delhi-110016*  
7 *(INDIA)*

8 <sup>†</sup>*Present Address: Centre for Magnetic and Spintronics Materials (CMSM), National Institute for Materials*  
9 *Science (NIMS), 3050047 (JAPAN)*

10 <sup>2</sup>*Indira Gandhi Centre for Atomic Research, HBNI, Kalpakkam, Tamilnadu -603102 (INDIA)*

11 *\*Corresponding author:sujeetc@iitd.ac.in*

12 # Authors contributed equally

13 **S1. Surface and Morphological Analysis: XRR and AFM**

14 The Fig. S1 (a) shows the XRR profile recorded for B-550 film sample of nominal thickness  
15 50nm. The presence Kiessig fringes even up to  $2\theta \sim 4$  assures the good surface quality and  
16 less intermixing at the interface <sup>1</sup>. The recorded curve was fitted using X-ray reflectivity  
17 (segmented V.1.2) software through simulation using the model which assumes the formation  
18 of a native oxide layer over the top surface of the CFCG film as shown in the inset of the Fig.  
19 S1 (a). The thickness, density, and roughness of CFCG and oxide layers evaluated through the  
20 fitted data is shown the inset of the bottom left of the Fig. S1 (a). The simulated curve gives  
21 the thickness of CFCG film  $\sim 47.59$  nm and that of oxide layer as  $\sim 3.32$  nm. The density of the  
22 CFCG film ( $\sim 6.78$  g/cc) is found to be nearly close to its bulk density value of 7.47 g/cc, which  
23 suggests that the grown film is non-porous and densely packed.

24 The topography of the CFCG film was investigated using AFM technique. The sample was  
25 scanned over an area of  $500 \times 500$  nm<sup>2</sup> in tapping mode. The cantilever of the dimension  
26  $225 \times 30 \times 3$   $\mu\text{m}^3$ , embedded with a platinum coated tip of radius  $< 10$  nm was used in tapping  
27 mode. The Fig. S1 (b) shows one of the AFM images recorded on the 50 nm thin CFCG film.  
28 It can be seen that film is quite homogeneous and clearly exhibits a granular microstructure.  
29 The grains formed are of spherical shape with an average size of  $\sim 25$  nm. The root mean square  
30 roughness ( $R_{\text{rms}}$ ) of the film is  $\sim 1.80$  nm which is equivalent to that obtained from XRR  
31 measurement ( $\sim 1.64$  nm)

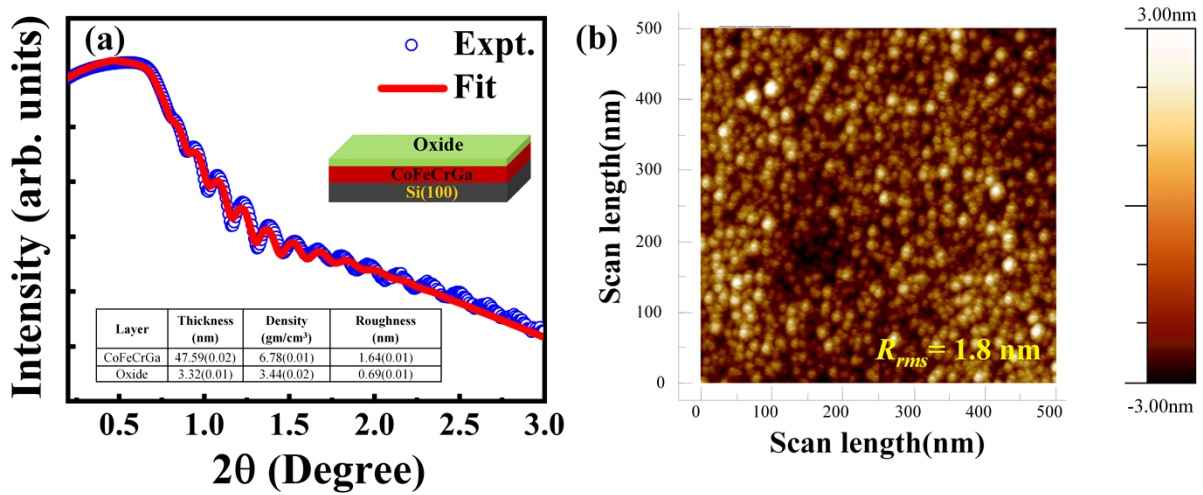

1

2 **Fig. S1 (a)** XRR spectra of the B-550 CFCG thin film. The simulation model and the values of the thickness,  
 3 density, and roughness (along with the errors in the parenthesis) extracted through the fitted data are shown in the  
 4 top right and bottom left of the main panel, respectively. **(b)** The topographical AFM image of B-550 sample with  
 5 its root mean square roughness ( $R_{rms}$ ).

### 6 **S3. Compositional Analysis: EDAX**

7 The EDAX measurement was performed over B-550 film to quantify and analyse the different  
 8 elements present in the sample as shown in Fig. S2 (a-e). Figures S2 (a, b, c & d) show the  
 9 elemental mapping of individual Co, Fe, Cr and Ga elements on  $\sim 250 \mu m^2$  area of the sample  
 10 which depicts that all the elements are uniformly distributed over the film surface and the film  
 11 sample is slightly Gallium deficient. The EDS spectrum (counts/sec vs keV) for Co, Fe, Cr,  
 12 Ga, and Si atoms is shown in Fig. S2 (e). The table in the inset shows the normalized  
 13 composition of Co, Fe, Cr and Ga elements in terms of weight and atomic percentage which  
 14 confirmed their stoichiometry to be  $Co_{24.2}Fe_{29.1}Cr_{25.1}Ga_{21.6}$ . The excess Fe and deficient Ga  
 15 may be possibly causing the disorder in the film sample.

16

17

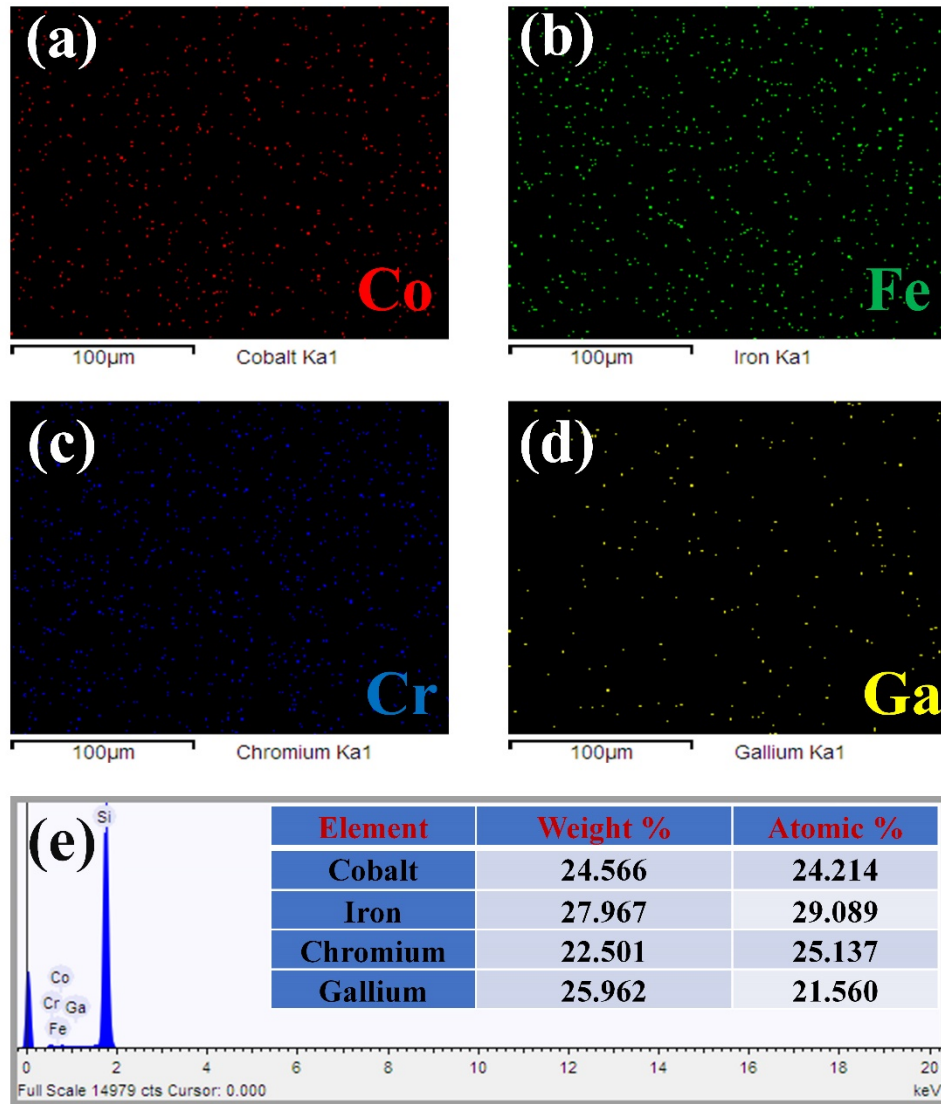

1

2 **FIG S2.** Elemental mapping of (a) Cobalt, (b) Iron, (c) Chromium and (d) Gallium on  $\sim 250\mu\text{m}^2$  area of the  
 3 sample. (e) EDS spectrum (counts/sec vs keV) for Co, Fe, Cr, Ga, and Si atoms with table in the inset showing  
 4 the normalized weight % and atomic% of CFCG film after removing the contribution of Si (100) substrate.

5

## 6 REFERENCES

- 7 1 N. K. Gupta, V. Barwal, S. Hait, L. Pandey, V. Mishra, L. Saravanan, A. Kumar, N.  
 8 Sharma, N. Kumar, S. Husain and S. Chaudhary, *Thin Solid Films*, 2022, **756**, 139355.

9
